# Supplementary material for: The views of people living with chronic stroke and aphasia on their potential involvement as research partners: a thematic analysis
Source: Springer Nature journal article supplement (doi:10.1186/s40900-022-00379-1), 2022-09-05
Supplement: MOESM1 [file 40900_2022_379_MOESM1_ESM.pdf]

# Supplementary Material

## 1. Typical Consent form

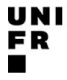

UNIVERSITÉ DE FRIBOURG  
UNIVERSITÄT FREIBURG

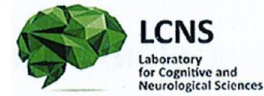

### Study Consent Form

Title of the Project: Development of the 'People with Aphasia and Other Laypeople Involvement (PAOLI) Framework', a comprehensive conceptual framework on PPI in aphasia research.

Name of Lead Researcher: Marina Charalambous PhD Researcher (University of Fribourg, Switzerland)  
Primary Supervisor: Jean-Marie ANNONI MD, PhD, Professor of Neurology (University of Fribourg, Switzerland)  
Secondary Supervisor: Maria Kambanaros, PhD, Professor in Speech Pathology (University of South Australia)

Please Initial Box

- I confirm that I have read the invitation letter for the above study. I have had the opportunity to consider the information, ask questions and have had these answered satisfactorily.
- I understand that my participation is voluntary and that I am free to withdraw at any time without giving any reason and without there being any negative consequences or my legal rights being affected. I understand that should I decide to withdraw then information already collected will be included in the data analysis in the study.
- I understand that relevant sections of my data collected in the study may be looked at by authorised individuals from the University of Fribourg, the research team, and regulatory authorities as part of the research audit process. I give permission for these individuals to have access to these records.
- I understand that my name will not be identified during the Delphi survey or in the reports resulting from the research and my personal details will be kept strictly confidential.
- I agree that non identifiable quotations and data may be used in this study and may be published in the research thesis, articles, on the study website and presented at conferences.
- I will not receive any payment for participating in this research study.
- I agree to take part in the above study.

| _____                                  | _____              | _____     |
|----------------------------------------|--------------------|-----------|
| Name of Participant                    | Date               | Signature |
| Marina Charalambous<br>Lead Researcher | 21/11/2020<br>Date |           |

**Completion:** Please return scanned or electronically completed forms via email to:  
[marina.charalambous@unifr.ch](mailto:marina.charalambous@unifr.ch)

**Further information:** Please do not hesitate to contact the lead researcher if you have any concerns or questions at: [marina.charalambous@unifr.ch](mailto:marina.charalambous@unifr.ch)

## 2. Aphasia Friendly Consent Form

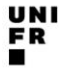

UNIVERSITÉ DE FRIBOURG  
UNIVERSITÄT FREIBURG

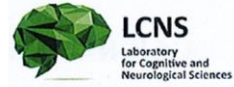

### Study Consent Form

Title of the Project: Development of the “People with Aphasia and Other Layperson Involvement (PAOLI) Framework”, a comprehensive conceptual framework for qualitative participatory approach in aphasia research.

Name of Lead Researcher: Marina Charalambous PhD Researcher (Unifr Switzerland)  
Primary Supervisor: Jean-Marie ANNONI MD, PhD, Professor of Neurology (Unifr Switzerland)  
Secondary Supervisor: Maria Kambanaros, PhD, Professor in Speech Pathology (UniSa Australia)

Please Initial Box

- I confirm that I have **read**  the invitation **letter** 
- I have had the opportunity to consider the **information** and ask **questions** 
- I understand that my **participation** is **voluntary** 
- I understand that I am free to **withdraw** at any time without giving any reason 
- I give **permission** to the University of Fribourg to have **access** to the records and data 
- I understand that my personal details will be kept strictly **confidential** 
- I agree that data will be **published** 
- I will not receive any **payment** for participating in this research study 
- I agree to **take part** in the above study. 

Name of Participant

Date

Signature

Marina Charalambous  
Lead Researcher

20/11/2020  
Date

**Completion:** Please return scanned or electronically completed forms via email to: [marina.charalambous@unifr.ch](mailto:marina.charalambous@unifr.ch)

**Further information:** Please do not hesitate to contact the lead researcher if you have any concerns or questions at: [marina.charalambous@unifr.ch](mailto:marina.charalambous@unifr.ch)
